# Supplementary material
Source: PubMed Central journal article supplement (PMC6433647)
Supplement: BPH-176-879-s001.pdf [file BPH-176-879-s001.pdf]

## Supplementary material:

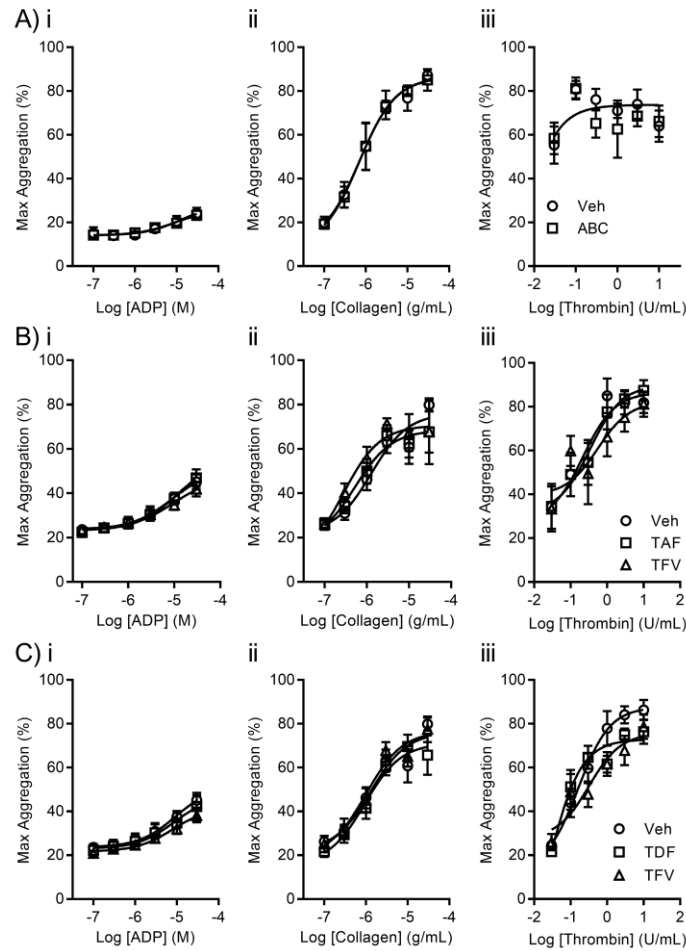

**Supplementary figure 1: *In vitro* responses of washed platelet suspensions are not affected by incubation with ART.** Platelet aggregation was monitored using washed platelet suspensions in a microplate assay. Platelets were treated with plasma  $C_{max}$  levels of ART, or their respective anabolite, for 30min at 37°C. Maximum aggregation is reported in responses to increasing concentrations of ADP (i), collagen (ii) or TRAP6 (iii). A) Platelets were treated with  $3\mu\text{g mL}^{-1}$  abacavir sulphate (ABC) or vehicle control (1% (v/v) DMSO). B) Aggregation was recorded following treatment with  $0.22\mu\text{g mL}^{-1}$  tenofovir alafenamide fumarate (TAF),  $15\text{ng mL}^{-1}$  tenofovir (TFV) or vehicle control (1% (v/v) DMSO). C) Platelets were incubated with  $0.33\mu\text{g mL}^{-1}$  tenofovir disoproxil fumarate (TDF),  $0.25\mu\text{g mL}^{-1}$  TFV or vehicle control (2% (v/v) DMSO). Data are representative of five independent experiments for each condition.

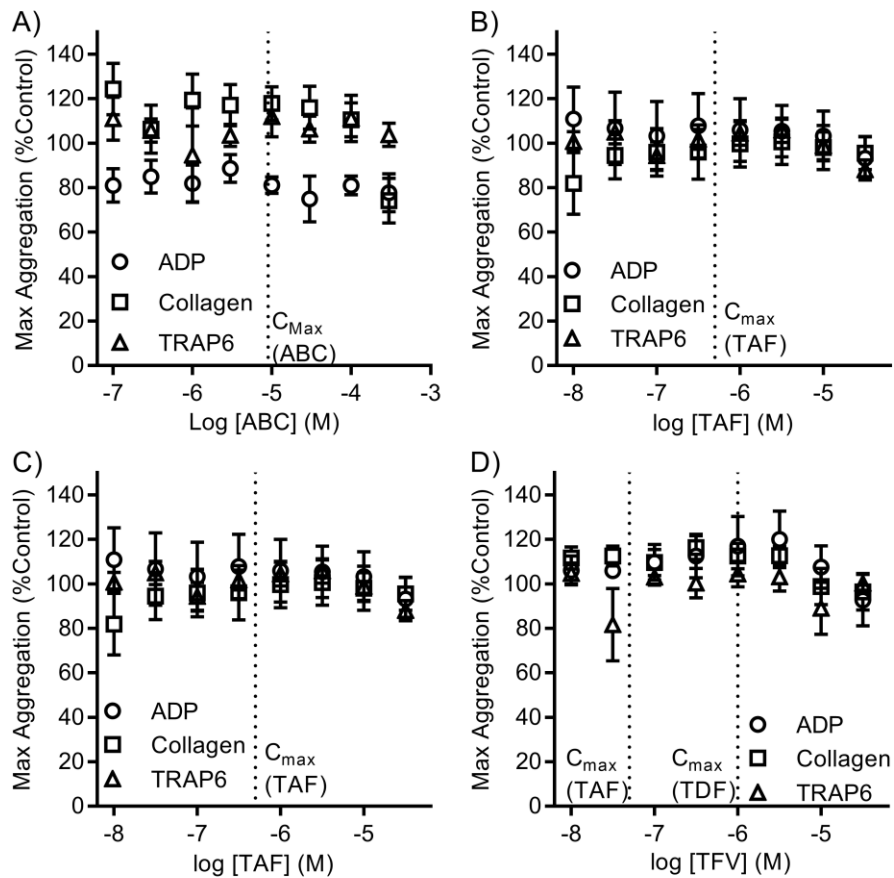

**Supplementary figure 2: In vitro platelet aggregation responses are not affected by incubation with ART.** Platelet aggregation was monitored using PRP in a microplate assay. Platelets were treated with increasing concentrations of abacavir sulphate (ABC; A), tenofovir alafenamide (TAF; B), tenofovir disoproxil fumarate (TDF; C), tenofovir (TFV; D) for 30min at 37°C. Platelets were stimulated by EC<sub>50</sub> levels of ADP (2µM; open circles), collagen (0.5µg mL<sup>-1</sup>; open squares) or TRAP6 (7.5µM; open triangles). Aggregation is normalised to vehicle control and dashed lines indicate the plasma C<sub>max</sub> of each drug. Data are representative of five independent experiments (ns = P>0.05).

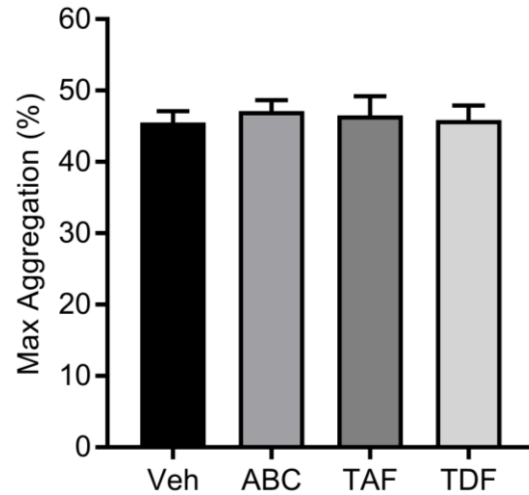

**Supplementary figure 3: Plasma  $C_{max}$  levels of ART do not alter collagen-evoked platelet aggregation.** Platelet aggregation was monitored in an aggregometer using PRP. Platelets were treated with increasing  $C_{max}$  levels abacavir sulphate (ABC;  $3\mu\text{g mL}^{-1}$ ), tenofovir alafenamide (TAF;  $0.22\mu\text{g mL}^{-1}$ ), tenofovir disoproxil fumarate (TDF;  $0.33\mu\text{g mL}^{-1}$ ), or vehicle control (1% (v/v) DMSO) for 30min at  $37^{\circ}\text{C}$ . Platelets were stimulated by  $10\mu\text{g mL}^{-1}$  collagen under stirring conditions and the maximum aggregation at 3mins is reported. Data are representative of eight independent experiments (ns =  $P>0.05$ ).

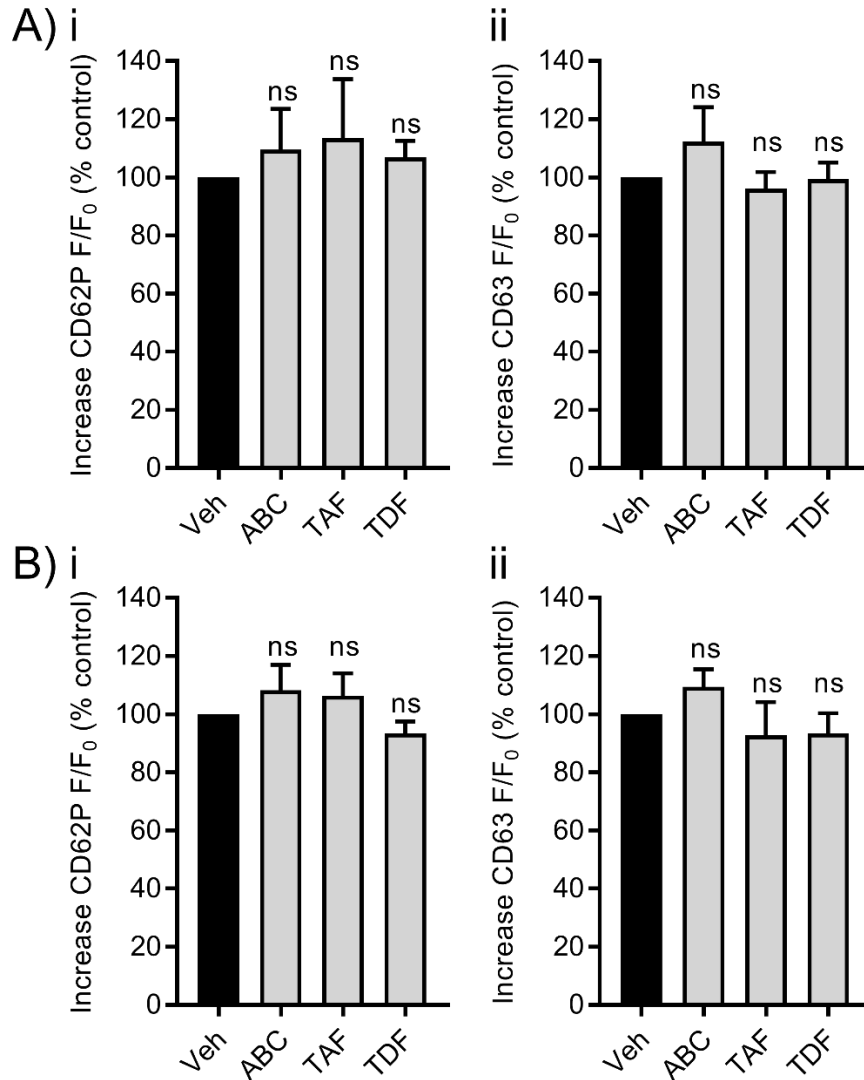

**Supplementary figure 4: ADP- and TRAP6-evoked expression of platelet activation markers is not altered by exposure to ART.** Real-time changes in surface expression of platelet granule markers were assessed by flow cytometry. Platelet-rich plasma was diluted 1:200 into physiological buffer containing fluorescently-conjugated CD62P and CD63 antibodies. Platelets were pre-incubated with abacavir sulphate (ABC; 3 $\mu\text{g mL}^{-1}$ ), tenofovir alafenamide fumarate (TAF; 0.22  $\mu\text{g mL}^{-1}$ ) or tenofovir disoproxil fumarate (TDF; 0.33  $\mu\text{g mL}^{-1}$ ) prior to stimulation by ADP (10 $\mu\text{M}$ ) or TRAP6 (10 $\mu\text{M}$ ). Increases in relative expression of CD62P (i) and CD63 (ii) are shown as a percentage of vehicle control (0.02% (v/v) DMSO). Data are representative of five independent experiments (ns =  $P > 0.05$ ).
